# Supplementary material for: Incorporation of the poorly soluble drug cefixime inside the micellar core of conventional and gemini surfactants
Source: Royal Society of Chemistry journal article supplement (doi:10.1039/d2nj00024e), 2022-01-01
Supplement: d2nj00024e1.pdf [file d2nj00024e1.pdf]

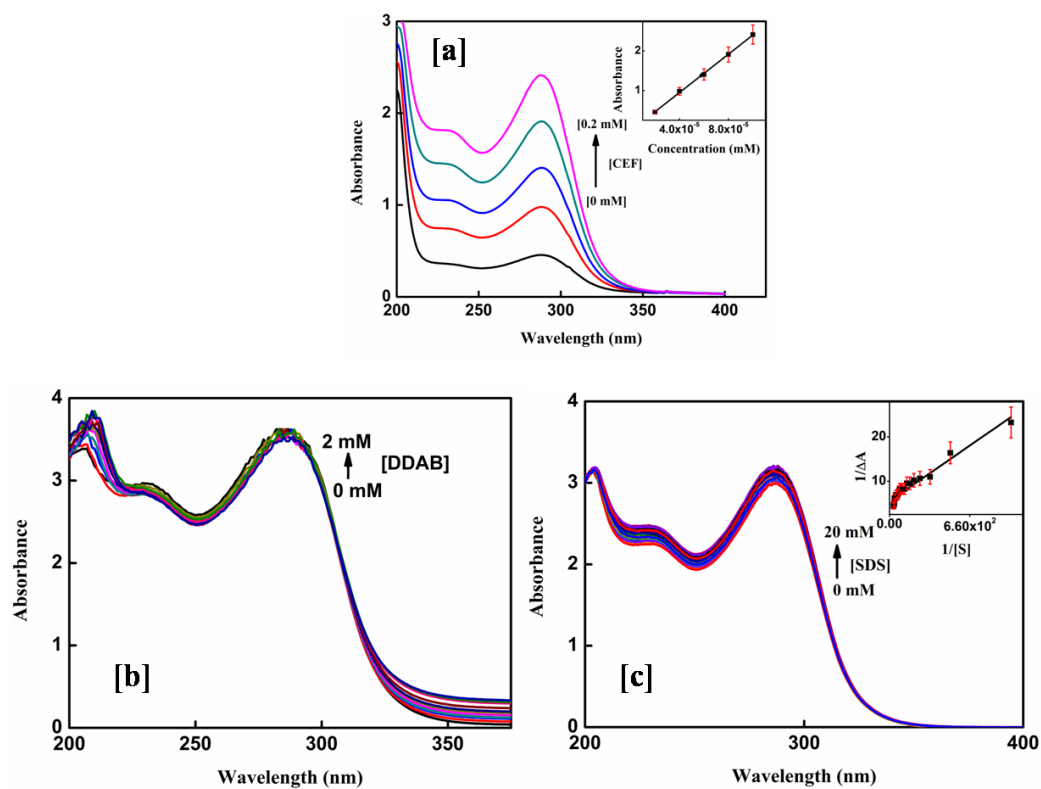

Fig. S3: (a) Absorption spectra of CEF inset: concentration vs absorbance plot of CEF and UV spectra of CEF (0.15 mM) in presence of varying concentrations of (b): DDAB (c) SDS in phosphate buffer (pH 7.4) at 298 K inset: Benesi-Hildebrand plot.

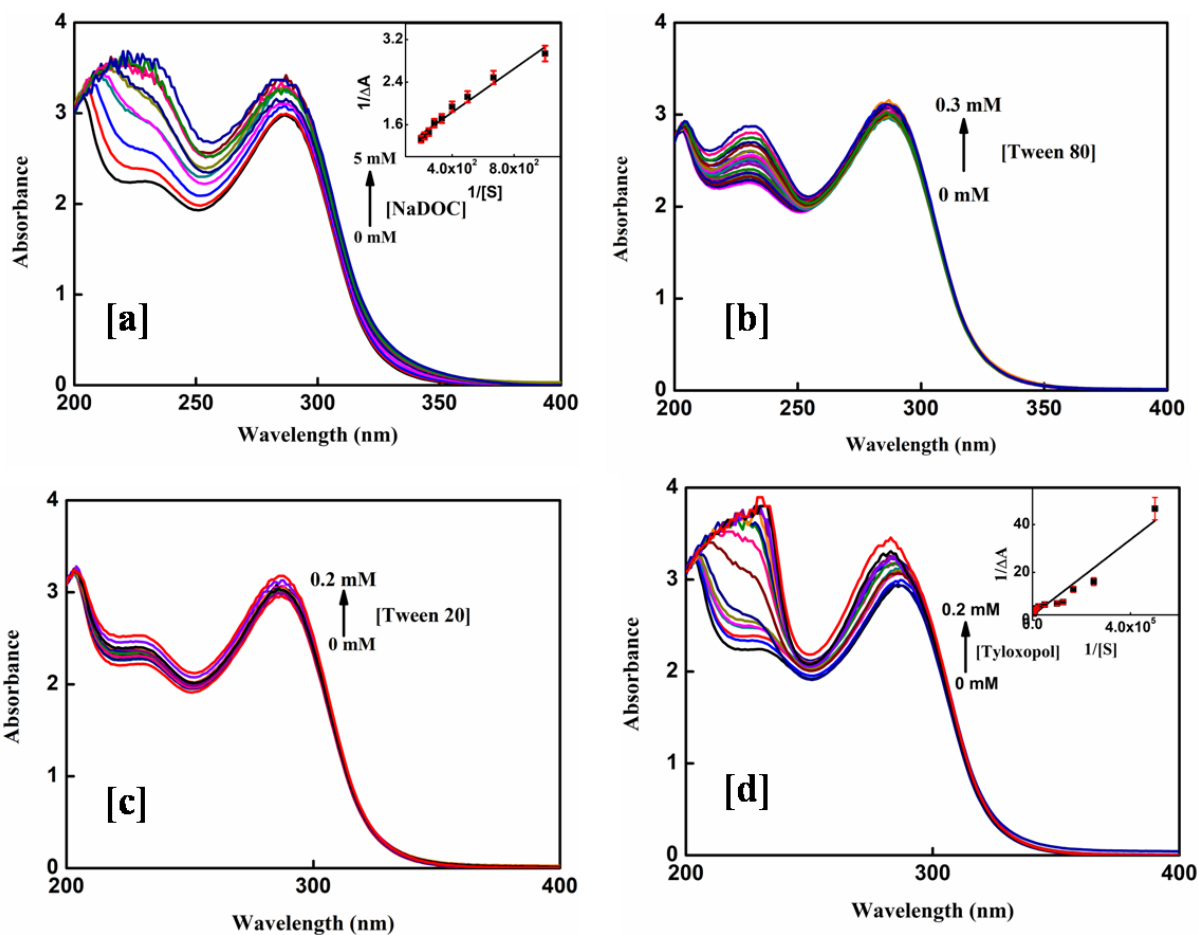

Fig. S4: UV spectra of CEF (0.15 mM) in presence of varying concentrations of (a): NaDOC (b) Tween 80 (c) Tween 20 and (d): Tyloxapol in phosphate buffer (pH 7.4) at 298 K inset: Benesi-Hildebrand plot.

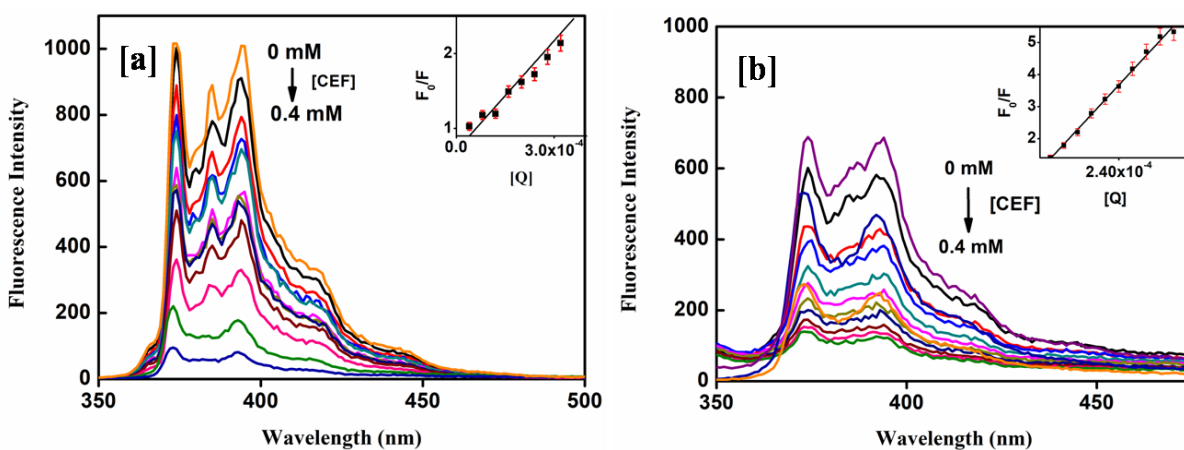

Fig. S5: Fluorescence spectra of pyrene at varying concentrations of CEF in presence of (a): DTAB and (b): DDAB in phosphate buffer (pH 7.4) at 298K inset: Stern-Volmer plot.

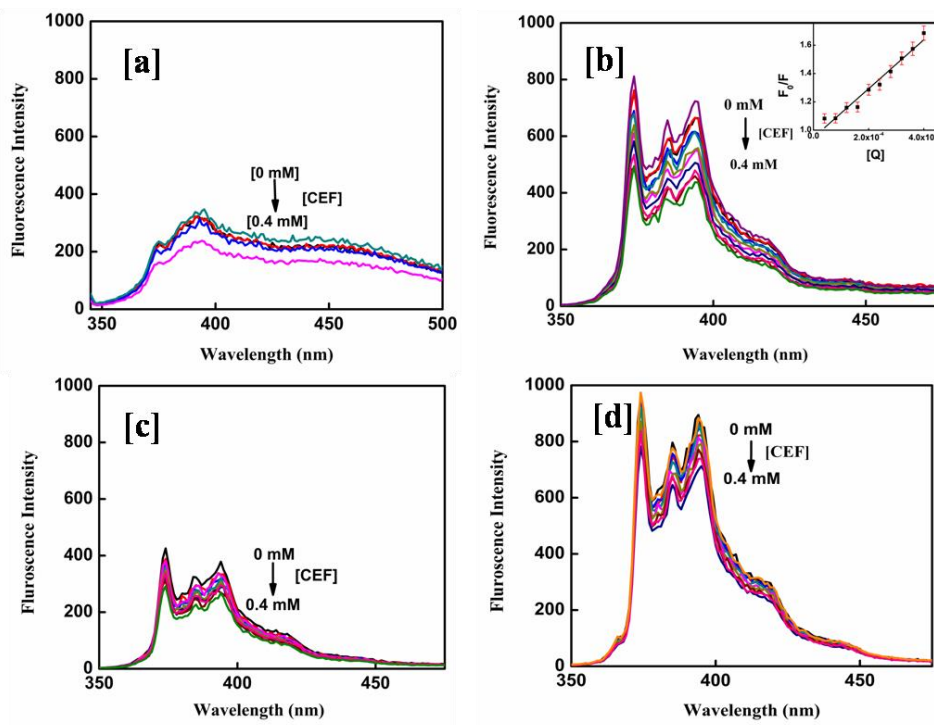

Fig. S6: Fluorescence spectra of pyrene at varying concentrations of CEF in presence of (a): NaDOC (b): Tween 80 (c) Tween 20 and (d) Tyloxapol in phosphate buffer (pH 7.4) at 298K inset: Stern-Volmer plot.

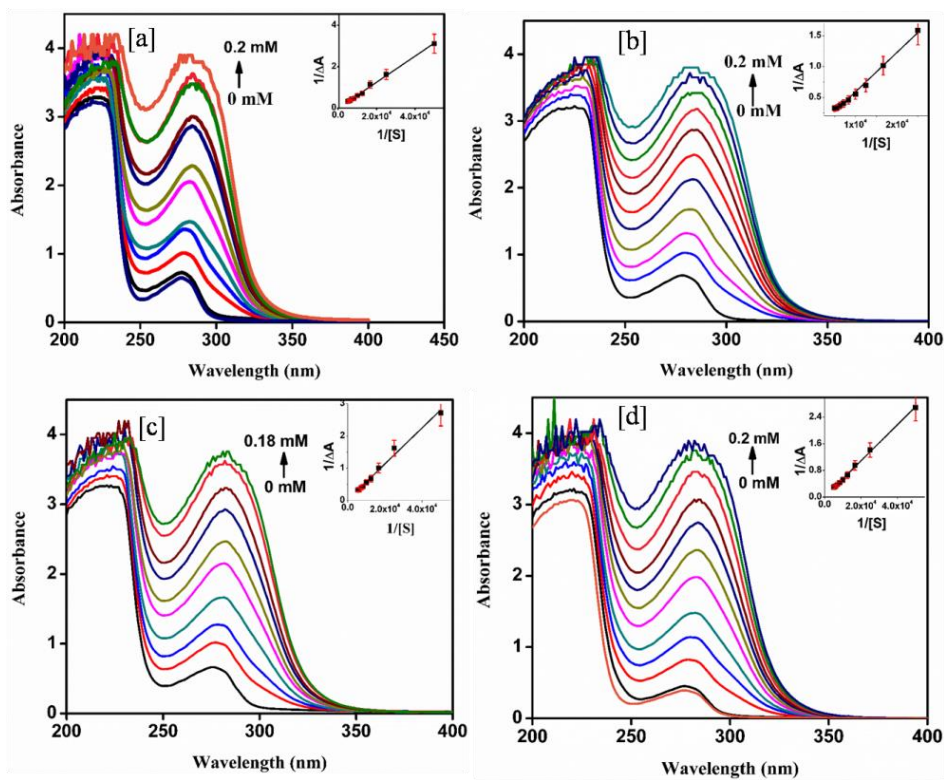

Fig. S7: UV spectrum of BSA at varying concentrations of CEF in presence of [a] CTAB (20 mM) [b] DTAB (20 mM) [c] SDS (20 mM) and [d] Tween-80 (0.3 mM) inset: Benesi-Hildebrand plot in phosphate buffer (pH 7.4) at 298 K.

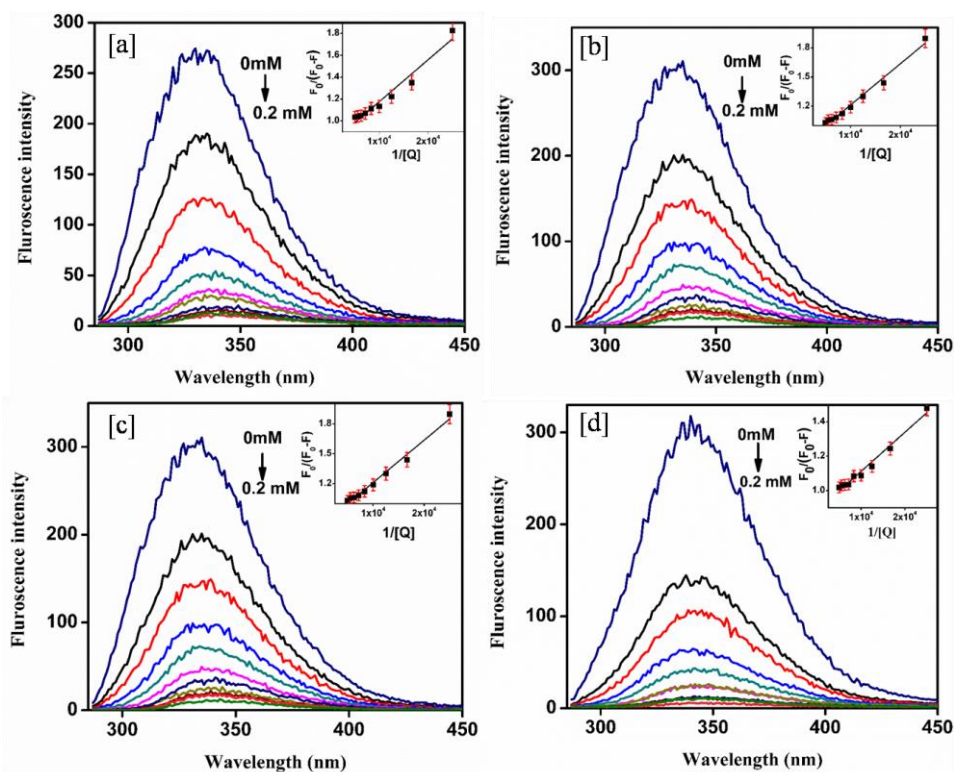

Fig.S8: Fluorescence spectra of BSA at varying concentrations of CEF in presence of [a] CTAB (20 mM) [b] DTAB (20 mM) [c] SDS (20 mM) [d] Tween-80 (0.3 mM) inset: Modified Stern-Volmer plot in phosphate buffer (pH 7.4) at 298 K.

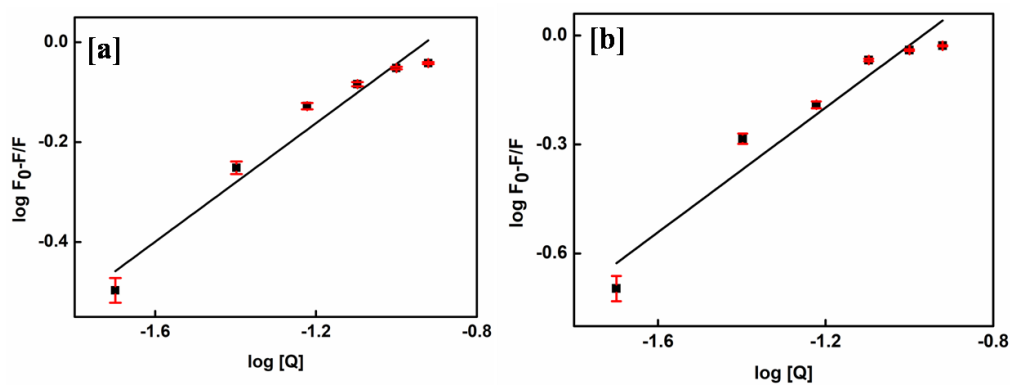

Fig S9: plot of  $\log F_0-F/F$  vs  $\log Q$  for the BSA at varying concentrations of CEF in presence of [a]: 12-3-12 (5 mM) [b]: 12-3-12 (0.5 mM) in phosphate buffer (pH 7.4) at 298K.

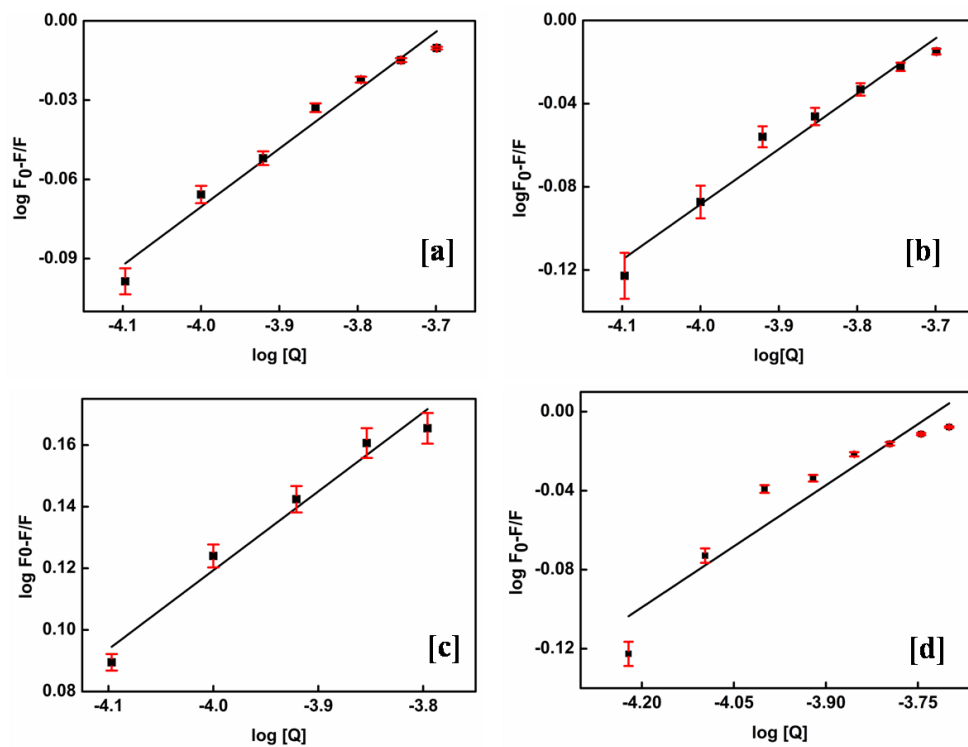

Fig. S10: plot of  $\log F_0-F/F$  vs  $\log Q$  for the BSA at varying concentrations of CEF in presence of [a]: CTAB (20mM) [b]: DTAB (20 mM) [c]: SDS (20 mM) [d]: Tween 80 (0.3 mM) in phosphate buffer (pH 7.4) at 298K.

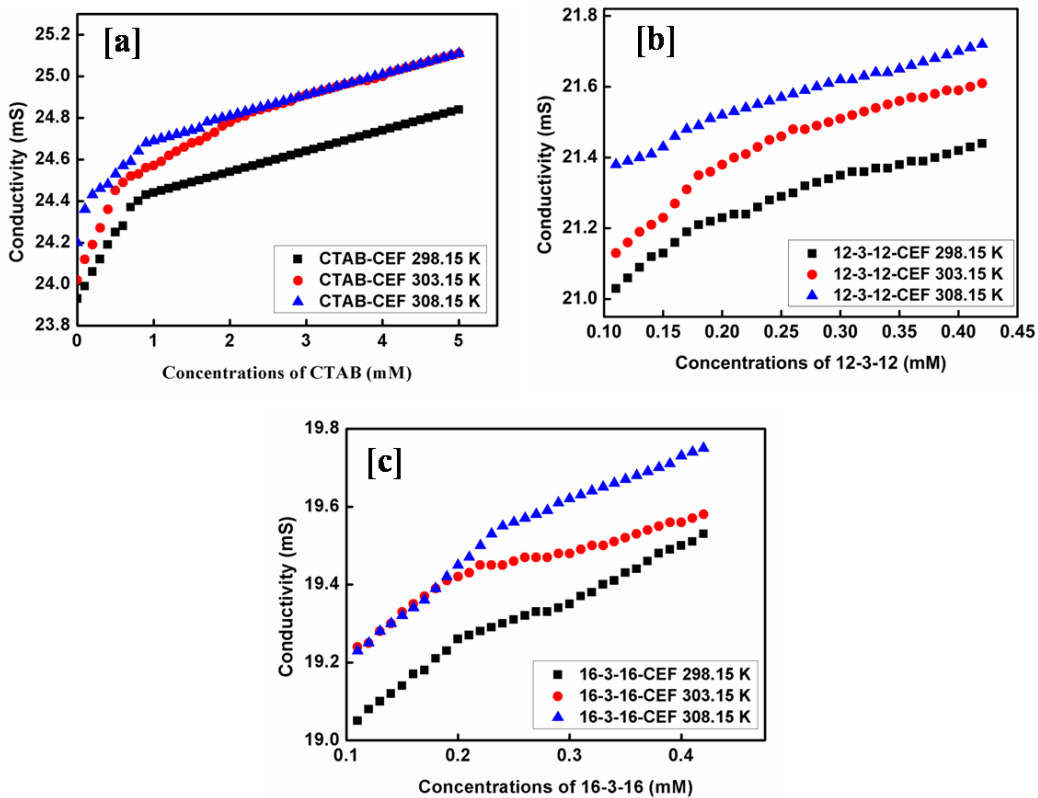

Fig. S11. Conductivity plots of (a) CTAB-CEF (b) 12-3-12-CEF (c) 16-3-16-CEF in pH 7.4 containing 0.15mMCEF.

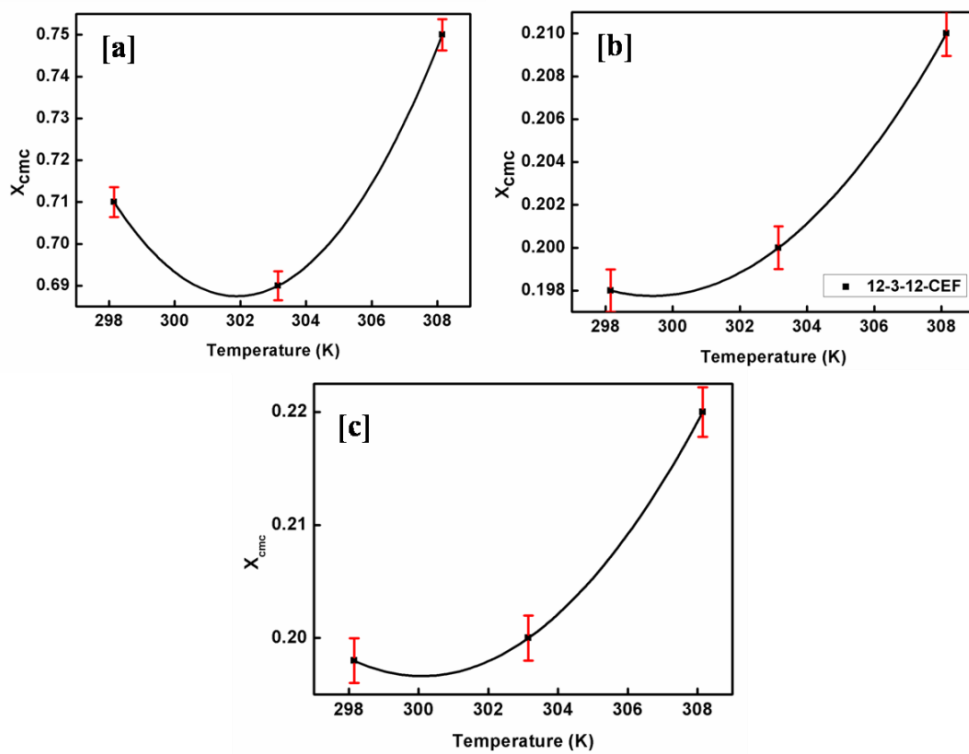



Fig. S12. Representative plots of  $X_{cmc}$  vs temperature in pH 7.4 containing 0.15mM CEF for (a) CTAB-CEF (b) 12-3-12-CEF (c) 16-3-16-CEF.

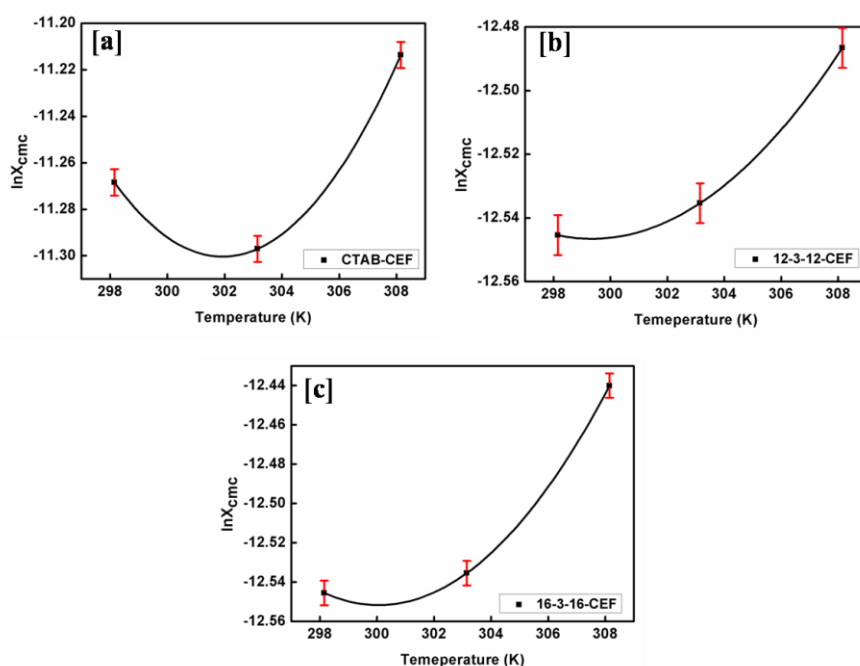

Fig. S13. Representative plots of  $\ln X_{cmc}$  versus temperature in pH 7.4 containing 0.15mM CEF for (a) CTAB-CEF (b) 12-3-12-CEF (c) 16-3-16-CEF.

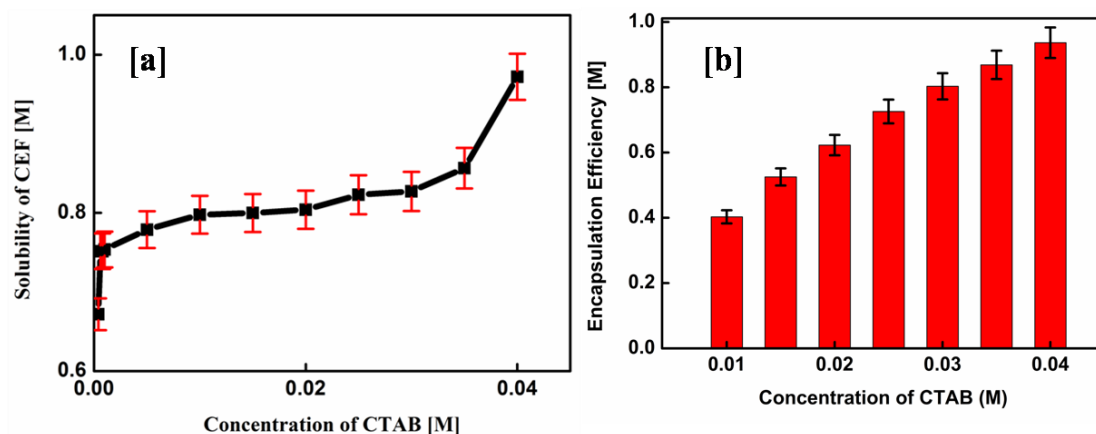

Fig. S14: Solubility plot for CEF with varying concentration of CTAB (0.1 – 40 mM) at 298 K in pH 7.4.

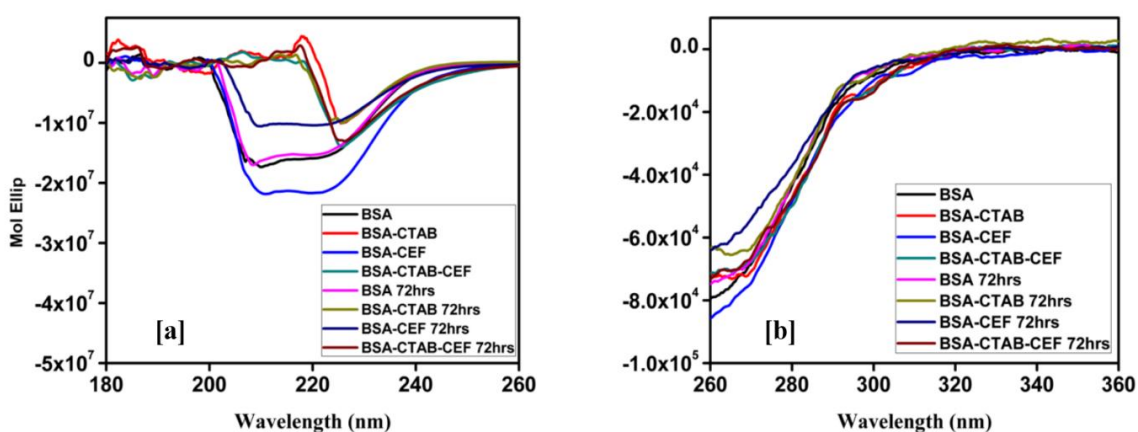

Fig. S15: (a) Far UV and (b) near UV CD spectra of BSA in presence of CEF (0.5 mM) with surfactant CTAB (20 mM) in phosphate buffer (pH 7.4) at 298 K.

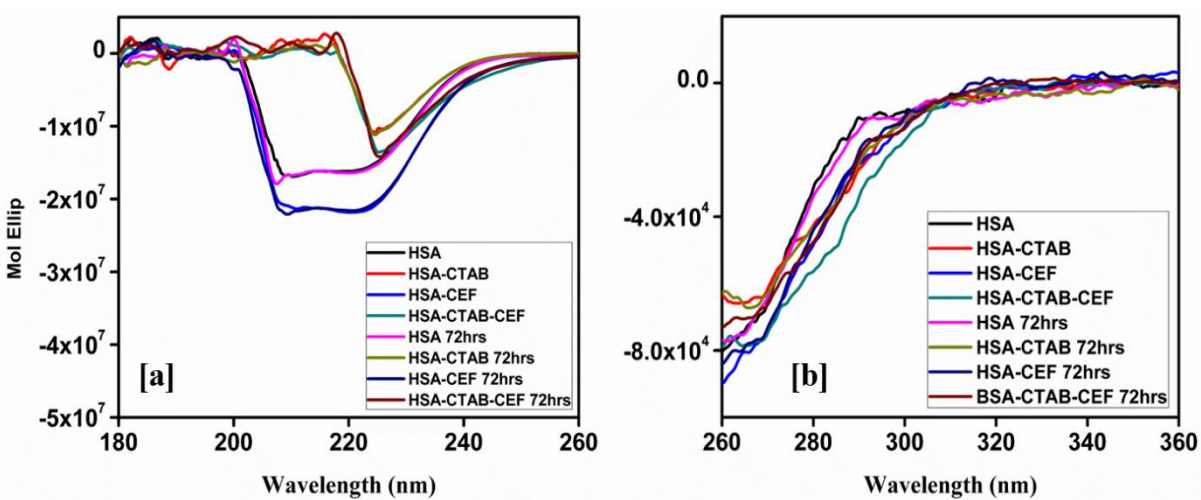

Fig.S16: (a) Far UV and (b) near UV CD spectra of HSA in presence of CEF (0.5 mM) with surfactant CTAB (20 mM) in phosphate buffer (pH 7.4) at 298 K.

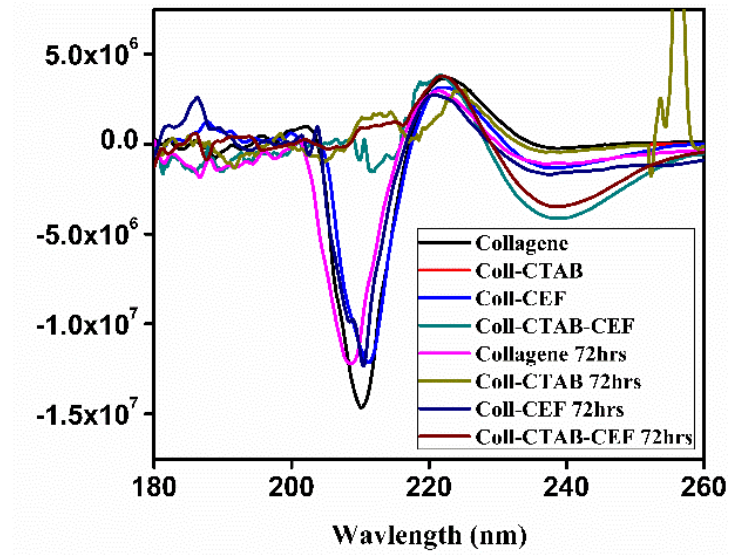

Fig.S17: Collagen spectra in presence of CEF (0.5 mM) with surfactant CTAB (20 mM) in phosphate buffer (pH 7.4) at 298 K
